# Supplementary material for: Exposure of Helicoverpa armigera Larvae to Plant Volatile Organic Compounds Induces Cytochrome P450 Monooxygenases and Enhances Larval Tolerance to the Insecticide Methomyl
Source: PubMed Central journal article supplement (PMC7998352; doi:10.3390/insects12030238), 2021-03-12
Supplement: insects-12-00238-s001.pdf [file insects-12-00238-s001.pdf]

**Table S1.** The primers forward and reverse sequences used for quantitative RT-PCR

| Gene Name<br>(Accession number) |    | Sequence                       | Length<br>(mer) | Product Length<br>(bp) | T <sub>m</sub><br>(°C) |
|---------------------------------|----|--------------------------------|-----------------|------------------------|------------------------|
| <i>CYP6B2</i><br>(U18085)       | -F | 5'-tgatggagacacttggaggactt -3' | 23              | 139                    | 52                     |
|                                 | -R | 5'-atgctttcacactctttgctcac -3' | 24              |                        |                        |
| <i>CYP6B6</i><br>(AF031468)     | -F | 5'- tcttgggacaacattattagc -3'  | 22              | 130                    | 59.4                   |
|                                 | -R | 5'-aagtgatgttactccatcaaga -3'  | 22              |                        |                        |
| <i>CYP6B7</i><br>(AF031468)     | -F | 5'-tcttgggacaacattattagc -3'   | 22              | 130                    | 52                     |
|                                 | -R | 5'-aagtgatgttactccatcaaga-3'   | 22              |                        |                        |
|                                 | -R | 5'-gtctcggtggaaggcaaaag -3'    | 20              |                        |                        |
| <i>EF-1a</i><br>(U20129)        | -F | 5'- gacaaacgtaccatcgagaag -3'  | 21              | 279                    | 51.1                   |
|                                 | -R | 5'- gataccagcctcgaactcac -3'   | 20              |                        |                        |
